# Supplementary material
Source: PubMed Central journal article supplement (PMC3968491)
Supplement: ASN.2013030290_ASN2013030290SupplementaryData.pdf [file ASN.2013030290_ASN2013030290SupplementaryData.pdf]

## Supplementary appendix

Table 1. List of drugs received by the patient during orthopedic surgery at onset of nephropathy

SEVORANE (sevoflurane) volatile anesthetic  
SUFENTA (sufentanil) opioid analgesic drug  
DIPRIVAN (propofol) hypnotic agent  
PERFALGAN (paracetamol) analgesic  
CELOCURINE (curare) succinylcholine chloride neuromuscular blocking drug  
TRACRIUM (atracuriumbesilate) non-depolarizing neuromuscular blocking drug  
ZOPHREN (ondansetron) antagonist of serotonin  
MORPHINE  
Dextrose 5%

Table 2. Circulating immune complexes in patient's sera

|                     | 2008                                                          | 2009                            |
|---------------------|---------------------------------------------------------------|---------------------------------|
| <b>CIC-C1q EIA</b>  | Less than 4 $\mu$ g Eq/ml                                     | Nearly equal to 4 $\mu$ g Eq/ml |
|                     | Both values considered negative for significant levels of CIC |                                 |
| <b>CIC-Raji EIA</b> | Around 3 $\mu$ g Eq/ml                                        | Around 10 $\mu$ g Eq/ml         |
|                     | Both values considered negative for significant levels of CIC |                                 |

Figure 1

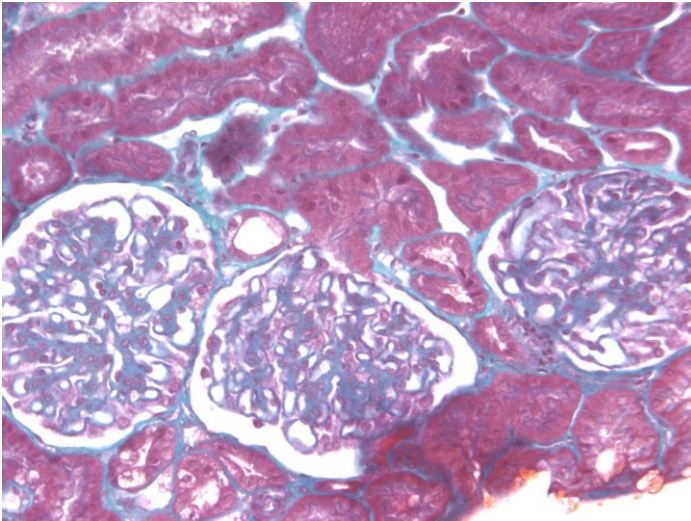

Masson's trichrome staining.

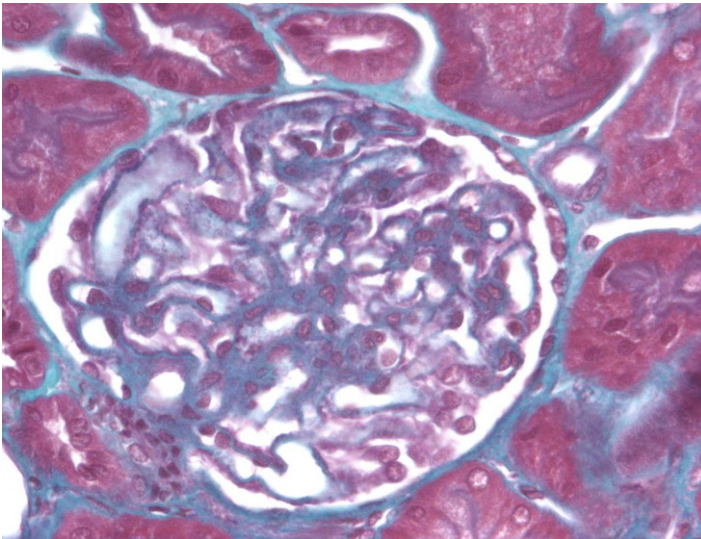

Glomerular basement membranes are thickened by diffuse epimembranous deposits.

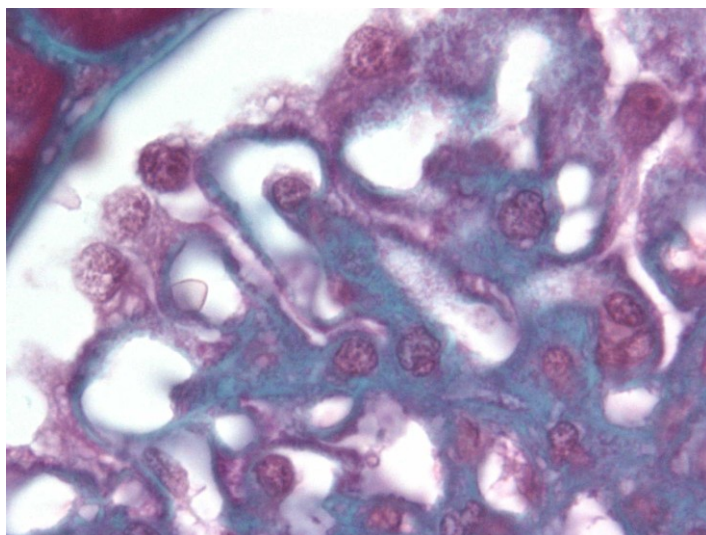

The podocytes are swelled

Figure 2

rhASB in glomerular immune deposits

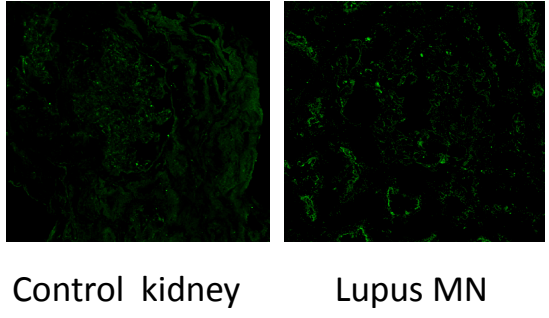

Rabbit anti-rhASB does not reveal granular staining along capillary loops in control kidney or in lupus MN

Figure 3

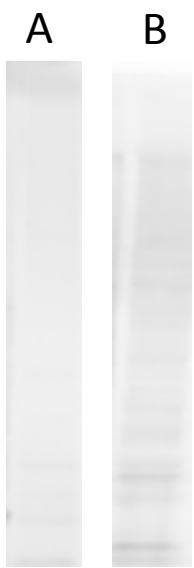

In Panels A and B, glomerular extracts were used as source of antigens in Western blot analysis and incubated with the serum of our patient (A) or with the serum of patient receiving another (idursulfatase) enzymotherapy (B)
